# Supplementary material
Source: publisher figshare collection journal article supplement (https://acs.figshare.com/ndownloader/files/5762769)
Supplement: Supplementary file 1 [file 5762769]

 
# ja983471i.cif

data_rap002f 
 
_audit_creation_method            SHELXL 
_chemical_name_systematic 
; 
 Dibenzo[f,j]phenanthro[9,10-s]picene 
; 
_chemical_name_common             'Hexabenzotriphenylene' 
_chemical_formula_moiety          'C42 H24'
_chemical_formula_structural      'C42 H24'
_chemical_formula_analytical      ? 
_chemical_formula_sum             'C42 H24' 
_chemical_formula_weight          528.61 
_chemical_melting_point           'above 350 deg C' 
_chemical_compound_source         'chemical synthesis' 
 
loop_ 
 _atom_type_symbol 
 _atom_type_description 
 _atom_type_scat_dispersion_real 
 _atom_type_scat_dispersion_imag 
 _atom_type_scat_source 
 'C'  'C'   0.0033   0.0016 
 'International Tables Vol C Tables 4.2.6.8 and 6.1.1.4' 
 'H'  'H'   0.0000   0.0000 
 'International Tables Vol C Tables 4.2.6.8 and 6.1.1.4' 
 
_symmetry_cell_setting            Monoclinic 
_symmetry_space_group_name_H-M    P2(1)/c 
 
loop_ 
 _symmetry_equiv_pos_as_xyz 
 'x, y, z' 
 '-x, y+1/2, -z+1/2' 
 '-x, -y, -z' 
 'x, -y-1/2, z-1/2' 
 
_cell_length_a                    19.9721(5) 
_cell_length_b                    7.0005(1) 
_cell_length_c                    19.5456(5) 
_cell_angle_alpha                 90.00 
_cell_angle_beta                  104.013(1) 
_cell_angle_gamma                 90.00 
_cell_volume                      2651.4(1) 
_cell_formula_units_Z             4 
_cell_measurement_temperature     298(2) 
_cell_measurement_reflns_used     45305 
_cell_measurement_theta_min       2.10 
_cell_measurement_theta_max       27.42 
 
_exptl_crystal_description        'Plate' 
_exptl_crystal_colour             'Orange' 
_exptl_crystal_size_max           0.28 
_exptl_crystal_size_mid           0.25 
_exptl_crystal_size_min           0.04 
_exptl_crystal_density_meas       'none' 
_exptl_crystal_density_diffrn     1.324 
_exptl_crystal_density_method     ? 
_exptl_crystal_F_000              1104 
_exptl_absorpt_coefficient_mu     0.075 
_exptl_absorpt_correction_type    ? 
_exptl_absorpt_correction_T_min   ? 
_exptl_absorpt_correction_T_max   ? 
 
_exptl_special_details 
; 
 Sample mounted on glass fiber 
; 
 
_diffrn_ambient_temperature       298(2) 
_diffrn_radiation_wavelength      0.71074 
_diffrn_radiation_type            MoK\a 
_diffrn_radiation_source          'fine-focus sealed tube' 
_diffrn_radiation_monochromator   graphite 
_diffrn_measurement_device        'Nonius KappaCCD' 
_diffrn_measurement_method        'oscillations; 651 deg data in 1 deg increments' 
_diffrn_standards_number          0 
_diffrn_standards_interval_count  ? 
_diffrn_standards_interval_time   ? 
_diffrn_standards_decay_%         ? 
_diffrn_reflns_number             45305 
_diffrn_reflns_av_R_equivalents   0.066 
_diffrn_reflns_av_sigmaI/netI     0.0471 
_diffrn_reflns_limit_h_min        0 
_diffrn_reflns_limit_h_max        25 
_diffrn_reflns_limit_k_min        0 
_diffrn_reflns_limit_k_max        9 
_diffrn_reflns_limit_l_min        -25 
_diffrn_reflns_limit_l_max        24 
_diffrn_reflns_theta_min          2.10 
_diffrn_reflns_theta_max          27.42 
_reflns_number_total              6016 
_reflns_number_observed           3652 
_reflns_observed_criterion        >2sigma(I) 
 
_computing_data_collection        'Nonius COLLECT' 
_computing_cell_refinement        'DENZO-SMN' 
_computing_data_reduction         'DENZO-SMN' 
_computing_structure_solution     'Siemens SHELXTL' 
_computing_structure_refinement   'Siemens SHELXTL' 
_computing_molecular_graphics     'Siemens SHELXTL' 
_computing_publication_material   'Siemens SHELXTL' 
 
_refine_special_details 
; 
 Refinement on F^2^ for ALL reflections except for 0 with very negative F^2^ 
 or flagged by the user for potential systematic errors.  Weighted R-factors 
 wR and all goodnesses of fit S are based on F^2^, conventional R-factors R 
 are based on F, with F set to zero for negative F^2^. The observed criterion 
 of F^2^ > 2sigma(F^2^) is used only for calculating _R_factor_obs etc. and is 
 not relevant to the choice of reflections for refinement.  R-factors based 
 on F^2^ are statistically about twice as large as those based on F, and R- 
 factors based on ALL data will be even larger. 
; 
 
_refine_ls_structure_factor_coef  Fsqd  
_refine_ls_matrix_type            full 
_refine_ls_weighting_scheme 
 'calc w=1/[\s^2^(Fo^2^)+(0.0600P)^2^+0.4023P] where P=(Fo^2^+2Fc^2^)/3' 
_atom_sites_solution_primary      direct 
_atom_sites_solution_secondary    difmap 
_atom_sites_solution_hydrogens    difmap 
_refine_ls_hydrogen_treatment     'xyz refined, isotropic' 
_refine_ls_extinction_method      none 
_refine_ls_extinction_coef        ? 
_refine_ls_number_reflns          6016 
_refine_ls_number_parameters      475 
_refine_ls_number_restraints      0 
_refine_ls_R_factor_all           0.1007 
_refine_ls_R_factor_obs           0.0512 
_refine_ls_wR_factor_all          0.1327 
_refine_ls_wR_factor_obs          0.1091 
_refine_ls_goodness_of_fit_all    1.013 
_refine_ls_goodness_of_fit_obs    1.095 
_refine_ls_restrained_S_all       1.013 
_refine_ls_restrained_S_obs       1.095 
_refine_ls_shift/esd_max          0.000 
_refine_ls_shift/esd_mean         0.000
_refine_diff_density_max          0.157 
_refine_diff_density_min         -0.179 
_refine_diff_density_rms          0.039 
 
 
loop_ 
 _atom_site_label 
 _atom_site_type_symbol 
 _atom_site_fract_x 
 _atom_site_fract_y 
 _atom_site_fract_z 
 _atom_site_U_iso_or_equiv 
 _atom_site_thermal_displace_type 
 _atom_site_occupancy 
 _atom_site_calc_flag 
 _atom_site_refinement_flags 
 _atom_site_disorder_group 
C1 C 0.16423(8) 0.8112(2) 0.13608(8) 0.0359(4) Uani 1 d . . 
C2 C 0.18747(8) 0.6887(2) 0.09020(8) 0.0359(4) Uani 1 d . . 
C3 C 0.25526(8) 0.6082(2) 0.11131(8) 0.0371(4) Uani 1 d . . 
C4 C 0.30279(8) 0.6867(2) 0.16886(9) 0.0390(4) Uani 1 d . . 
C5 C 0.27856(8) 0.8091(2) 0.21632(9) 0.0389(4) Uani 1 d . . 
C6 C 0.21308(8) 0.8904(2) 0.19548(8) 0.0374(4) Uani 1 d . . 
C7 C 0.08907(8) 0.8281(2) 0.12634(9) 0.0384(4) Uani 1 d . . 
C8 C 0.05972(9) 0.8673(3) 0.18344(10) 0.0470(4) Uani 1 d . . 
H8 H 0.0913(9) 0.8982(23) 0.2296(10) 0.047(5) Uiso 1 d . . 
C9 C -0.01054(10) 0.8615(3) 0.17591(12) 0.0566(5) Uani 1 d . . 
H9 H -0.0265(10) 0.8888(28) 0.2190(11) 0.068(6) Uiso 1 d . . 
C10 C -0.05409(10) 0.8175(3) 0.11129(12) 0.0610(6) Uani 1 d . . 
H10 H -0.1051(11) 0.8143(28) 0.1060(11) 0.074(6) Uiso 1 d . . 
C11 C -0.02702(10) 0.7744(3) 0.05562(12) 0.0561(5) Uani 1 d . . 
H11 H -0.0597(10) 0.7377(26) 0.0087(11) 0.064(6) Uiso 1 d . . 
C12 C 0.04438(8) 0.7764(2) 0.06184(9) 0.0426(4) Uani 1 d . . 
C13 C 0.07390(9) 0.7218(2) 0.00366(9) 0.0433(4) Uani 1 d . . 
C14 C 0.03539(11) 0.7214(3) -0.06643(11) 0.0592(5) Uani 1 d . . 
H14 H -0.0139(10) 0.7521(26) -0.0733(10) 0.062(6) Uiso 1 d . . 
C15 C 0.06476(12) 0.6790(3) -0.12074(11) 0.0653(6) Uani 1 d . . 
H15 H 0.0354(12) 0.6789(32) -0.1705(13) 0.091(7) Uiso 1 d . . 
C16 C 0.13413(11) 0.6380(3) -0.10717(11) 0.0547(5) Uani 1 d . . 
H16 H 0.1569(10) 0.6111(28) -0.1466(11) 0.069(6) Uiso 1 d . . 
C17 C 0.17333(10) 0.6360(2) -0.03931(9) 0.0442(4) Uani 1 d . . 
H17 H 0.2228(9) 0.6166(23) -0.0312(9) 0.046(5) Uiso 1 d . . 
C18 C 0.14406(8) 0.6726(2) 0.01794(9) 0.0383(4) Uani 1 d . . 
C19 C 0.27583(9) 0.4298(2) 0.08176(8) 0.0414(4) Uani 1 d . . 
C20 C 0.22681(11) 0.2946(2) 0.04872(10) 0.0489(5) Uani 1 d . . 
H20 H 0.1770(9) 0.3227(24) 0.0432(9) 0.050(5) Uiso 1 d . . 
C21 C 0.24604(13) 0.1207(3) 0.02759(11) 0.0601(6) Uani 1 d . . 
H21 H 0.2094(10) 0.0306(28) 0.0047(10) 0.061(6) Uiso 1 d . . 
C22 C 0.31506(14) 0.0734(3) 0.03972(13) 0.0711(7) Uani 1 d . . 
H22 H 0.3286(11) -0.0484(35) 0.0242(12) 0.085(7) Uiso 1 d . . 
C23 C 0.36400(14) 0.1997(3) 0.07309(12) 0.0654(6) Uani 1 d . . 
H23 H 0.4133(11) 0.1716(29) 0.0842(11) 0.072(6) Uiso 1 d . . 
C24 C 0.34594(9) 0.3804(3) 0.09492(9) 0.0477(5) Uani 1 d . . 
C25 C 0.39703(9) 0.5172(3) 0.13145(9) 0.0482(5) Uani 1 d . . 
C26 C 0.46613(11) 0.5127(4) 0.12655(11) 0.0635(6) Uani 1 d . . 
H26 H 0.4821(11) 0.4115(32) 0.0984(11) 0.079(7) Uiso 1 d . . 
C27 C 0.51258(11) 0.6487(4) 0.15880(12) 0.0729(7) Uani 1 d . . 
H27 H 0.5589(12) 0.6416(31) 0.1530(12) 0.087(7) Uiso 1 d . . 
C28 C 0.49171(10) 0.7940(4) 0.19675(12) 0.0668(6) Uani 1 d . . 
H28 H 0.5240(11) 0.8959(30) 0.2182(11) 0.072(6) Uiso 1 d . . 
C29 C 0.42444(9) 0.8022(3) 0.20231(10) 0.0532(5) Uani 1 d . . 
H29 H 0.4094(9) 0.9104(27) 0.2256(10) 0.059(6) Uiso 1 d . . 
C30 C 0.37622(8) 0.6634(3) 0.17089(9) 0.0444(4) Uani 1 d . . 
C31 C 0.31598(8) 0.8329(3) 0.29035(9) 0.0431(4) Uani 1 d . . 
C32 C 0.36213(9) 0.6926(3) 0.32519(10) 0.0518(5) Uani 1 d . . 
H32 H 0.3716(9) 0.5823(27) 0.2979(10) 0.058(6) Uiso 1 d . . 
C33 C 0.39168(11) 0.7039(4) 0.39626(11) 0.0628(6) Uani 1 d . . 
H33 H 0.4234(10) 0.5967(29) 0.4191(11) 0.072(6) Uiso 1 d . . 
C34 C 0.37583(11) 0.8568(4) 0.43473(12) 0.0660(6) Uani 1 d . . 
H34 H 0.3980(10) 0.8688(29) 0.4846(12) 0.075(6) Uiso 1 d . . 
C35 C 0.32983(11) 0.9933(3) 0.40278(11) 0.0599(6) Uani 1 d . . 
H35 H 0.3163(11) 1.0996(32) 0.4319(12) 0.084(7) Uiso 1 d . . 
C36 C 0.29797(9) 0.9836(3) 0.33054(9) 0.0471(4) Uani 1 d . . 
C37 C 0.24611(9) 1.1198(3) 0.29545(10) 0.0476(5) Uani 1 d . . 
C38 C 0.23868(13) 1.3013(3) 0.32427(13) 0.0647(6) Uani 1 d . . 
H38 H 0.2701(11) 1.3305(30) 0.3697(12) 0.076(7) Uiso 1 d . . 
C39 C 0.19020(13) 1.4284(3) 0.28939(15) 0.0718(7) Uani 1 d . . 
H39 H 0.1868(11) 1.5587(36) 0.3111(12) 0.092(7) Uiso 1 d . . 
C40 C 0.14825(12) 1.3822(3) 0.22431(14) 0.0638(6) Uani 1 d . . 
H40 H 0.1147(11) 1.4826(31) 0.1970(12) 0.082(7) Uiso 1 d . . 
C41 C 0.15421(10) 1.2065(3) 0.19514(11) 0.0512(5) Uani 1 d . . 
H41 H 0.1254(9) 1.1749(27) 0.1464(11) 0.062(6) Uiso 1 d . . 
C42 C 0.20206(9) 1.0702(2) 0.23024(9) 0.0427(4) Uani 1 d . . 
 
loop_ 
 _atom_site_aniso_label 
 _atom_site_aniso_U_11 
 _atom_site_aniso_U_22 
 _atom_site_aniso_U_33 
 _atom_site_aniso_U_23 
 _atom_site_aniso_U_13 
 _atom_site_aniso_U_12 
C1 0.0365(9) 0.0383(9) 0.0344(9) 0.0049(7) 0.0112(7) 0.0028(7) 
C2 0.0353(9) 0.0370(8) 0.0368(9) 0.0017(7) 0.0115(7) -0.0006(7) 
C3 0.0364(9) 0.0414(9) 0.0354(9) 0.0009(7) 0.0122(7) 0.0029(7) 
C4 0.0359(9) 0.0452(10) 0.0365(9) 0.0010(7) 0.0098(7) 0.0032(7) 
C5 0.0364(9) 0.0457(9) 0.0360(9) -0.0018(7) 0.0118(7) -0.0022(7) 
C6 0.0374(9) 0.0412(9) 0.0360(9) -0.0009(7) 0.0138(7) 0.0011(7) 
C7 0.0365(9) 0.0392(9) 0.0401(10) 0.0061(7) 0.0104(8) 0.0051(7) 
C8 0.0427(11) 0.0578(11) 0.0420(11) 0.0044(9) 0.0133(9) 0.0060(9) 
C9 0.0478(12) 0.0711(13) 0.0567(13) 0.0070(10) 0.0237(10) 0.0089(10) 
C10 0.0351(11) 0.0734(14) 0.075(2) -0.0001(11) 0.0140(11) 0.0034(9) 
C11 0.0378(11) 0.0643(12) 0.0630(14) -0.0085(10) 0.0058(10) 0.0024(9) 
C12 0.0382(10) 0.0414(9) 0.0469(11) 0.0009(8) 0.0080(8) 0.0049(7) 
C13 0.0418(10) 0.0415(9) 0.0431(10) -0.0010(8) 0.0039(8) 0.0033(7) 
C14 0.0522(13) 0.0685(13) 0.0499(13) -0.0070(10) -0.0014(10) 0.0142(10) 
C15 0.077(2) 0.0717(14) 0.0390(12) -0.0075(10) -0.0010(11) 0.0169(11) 
C16 0.0690(14) 0.0550(12) 0.0399(11) -0.0015(9) 0.0126(10) 0.0089(10) 
C17 0.0480(11) 0.0450(10) 0.0406(11) 0.0007(8) 0.0128(9) 0.0012(8) 
C18 0.0421(10) 0.0356(9) 0.0359(9) -0.0016(7) 0.0068(8) -0.0006(7) 
C19 0.0512(11) 0.0418(9) 0.0334(9) 0.0041(7) 0.0149(8) 0.0078(8) 
C20 0.0616(13) 0.0406(10) 0.0471(11) 0.0005(8) 0.0182(10) 0.0000(9) 
C21 0.086(2) 0.0416(11) 0.0559(13) -0.0018(9) 0.0243(12) -0.0010(11) 
C22 0.108(2) 0.0439(12) 0.068(2) -0.0007(11) 0.0350(14) 0.0200(13) 
C23 0.076(2) 0.0627(14) 0.0608(14) 0.0063(11) 0.0232(12) 0.0308(12) 
C24 0.0547(11) 0.0530(11) 0.0371(10) 0.0051(8) 0.0146(8) 0.0181(9) 
C25 0.0425(10) 0.0655(12) 0.0374(10) 0.0059(9) 0.0112(8) 0.0178(9) 
C26 0.0471(12) 0.094(2) 0.0515(13) 0.0019(12) 0.0159(10) 0.0231(12) 
C27 0.0363(12) 0.124(2) 0.0598(14) 0.0049(14) 0.0154(11) 0.0125(13) 
C28 0.0417(12) 0.102(2) 0.0587(14) -0.0043(13) 0.0150(10) -0.0072(12) 
C29 0.0390(11) 0.0758(14) 0.0454(11) -0.0023(10) 0.0115(9) -0.0008(10) 
C30 0.0372(10) 0.0605(11) 0.0362(10) 0.0042(8) 0.0101(8) 0.0064(8) 
C31 0.0341(9) 0.0596(11) 0.0368(10) -0.0035(8) 0.0106(7) -0.0082(8) 
C32 0.0400(10) 0.0727(13) 0.0424(11) 0.0016(10) 0.0092(9) -0.0020(9) 
C33 0.0483(12) 0.093(2) 0.0451(12) 0.0094(12) 0.0071(10) -0.0063(11) 
C34 0.0568(13) 0.105(2) 0.0357(12) -0.0060(12) 0.0097(10) -0.0215(13) 
C35 0.0535(12) 0.085(2) 0.0443(12) -0.0169(11) 0.0186(10) -0.0196(11) 
C36 0.0434(10) 0.0621(12) 0.0397(10) -0.0115(9) 0.0180(8) -0.0167(9) 
C37 0.0499(11) 0.0515(10) 0.0495(11) -0.0115(9) 0.0275(9) -0.0117(9) 
C38 0.074(2) 0.0632(14) 0.0659(15) -0.0230(12) 0.0339(13) -0.0200(12) 
C39 0.091(2) 0.0467(13) 0.094(2) -0.0160(13) 0.053(2) -0.0064(12) 
C40 0.077(2) 0.0445(12) 0.083(2) 0.0050(11) 0.0462(14) 0.0037(11) 
C41 0.0576(12) 0.0445(11) 0.0592(13) 0.0040(9) 0.0294(10) 0.0049(9) 
C42 0.0455(10) 0.0446(10) 0.0449(11) -0.0053(8) 0.0240(8) -0.0039(8) 
 
_geom_special_details 
; 
 All esds (except the esd in the dihedral angle between two l.s. planes) 
 are estimated using the full covariance matrix.  The cell esds are taken 
 into account individually in the estimation of esds in distances, angles 
 and torsion angles; correlations between esds in cell parameters are only 
 used when they are defined by crystal symmetry.  An approximate (isotropic) 
 treatment of cell esds is used for estimating esds involving l.s. planes. 
; 
 
loop_ 
 _geom_bond_atom_site_label_1 
 _geom_bond_atom_site_label_2 
 _geom_bond_distance 
 _geom_bond_site_symmetry_2 
 _geom_bond_publ_flag 
C1 C2 1.399(2) . yes 
C1 C6 1.435(2) . yes 
C1 C7 1.471(2) . yes 
C2 C3 1.432(2) . yes 
C2 C18 1.472(2) . yes 
C3 C4 1.397(2) . yes 
C3 C19 1.475(2) . yes 
C4 C5 1.431(2) . yes 
C4 C30 1.467(2) . yes 
C5 C6 1.393(2) . yes 
C5 C31 1.468(2) . yes 
C6 C42 1.472(2) . yes 
C7 C12 1.404(2) . yes 
C7 C8 1.408(2) . yes 
C8 C9 1.376(3) . yes 
C8 H8 0.99(2) . ? 
C9 C10 1.384(3) . yes 
C9 H9 0.99(2) . ? 
C10 C11 1.361(3) . yes 
C10 H10 1.00(2) . ? 
C11 C12 1.402(2) . yes 
C11 H11 1.02(2) . ? 
C12 C13 1.453(2) . yes 
C13 C14 1.399(3) . yes 
C13 C18 1.404(2) . yes 
C14 C15 1.364(3) . yes 
C14 H14 0.98(2) . ? 
C15 C16 1.376(3) . yes 
C15 H15 1.01(2) . ? 
C16 C17 1.367(3) . yes 
C16 H16 1.00(2) . ? 
C17 C18 1.406(2) . yes 
C17 H17 0.97(2) . ? 
C19 C20 1.402(2) . yes 
C19 C24 1.404(2) . yes 
C20 C21 1.370(3) . yes 
C20 H20 0.99(2) . ? 
C21 C22 1.381(3) . yes 
C21 H21 0.99(2) . ? 
C22 C23 1.362(3) . yes 
C22 H22 0.97(2) . ? 
C23 C24 1.410(3) . yes 
C23 H23 0.97(2) . ? 
C24 C25 1.454(3) . yes 
C25 C30 1.403(2) . yes 
C25 C26 1.407(3) . yes 
C26 C27 1.372(3) . yes 
C26 H26 1.00(2) . ? 
C27 C28 1.382(3) . yes 
C27 H27 0.96(2) . ? 
C28 C29 1.375(3) . yes 
C28 H28 0.98(2) . ? 
C29 C30 1.401(3) . yes 
C29 H29 0.97(2) . ? 
C31 C32 1.405(3) . yes 
C31 C36 1.413(2) . yes 
C32 C33 1.374(3) . yes 
C32 H32 0.98(2) . ? 
C33 C34 1.388(3) . yes 
C33 H33 1.01(2) . ? 
C34 C35 1.367(3) . yes 
C34 H34 0.97(2) . ? 
C35 C36 1.403(3) . yes 
C35 H35 1.01(2) . ? 
C36 C37 1.452(3) . yes 
C37 C42 1.406(2) . yes 
C37 C38 1.412(3) . yes 
C38 C39 1.369(3) . yes 
C38 H38 0.98(2) . ? 
C39 C40 1.381(3) . yes 
C39 H39 1.02(2) . ? 
C40 C41 1.374(3) . yes 
C40 H40 1.03(2) . ? 
C41 C42 1.406(2) . yes 
C41 H41 1.01(2) . ? 
 
loop_ 
 _geom_angle_atom_site_label_1 
 _geom_angle_atom_site_label_2 
 _geom_angle_atom_site_label_3 
 _geom_angle 
 _geom_angle_site_symmetry_1 
 _geom_angle_site_symmetry_3 
 _geom_angle_publ_flag 
C2 C1 C6 119.31(14) . . yes 
C2 C1 C7 116.92(14) . . yes 
C6 C1 C7 123.11(14) . . yes 
C1 C2 C3 119.60(14) . . yes 
C1 C2 C18 116.90(14) . . yes 
C3 C2 C18 122.86(14) . . yes 
C4 C3 C2 119.19(14) . . yes 
C4 C3 C19 116.68(14) . . yes 
C2 C3 C19 123.63(14) . . yes 
C3 C4 C5 119.17(14) . . yes 
C3 C4 C30 117.25(14) . . yes 
C5 C4 C30 122.84(15) . . yes 
C6 C5 C4 119.72(14) . . yes 
C6 C5 C31 117.35(14) . . yes 
C4 C5 C31 122.39(14) . . yes 
C5 C6 C1 119.02(14) . . yes 
C5 C6 C42 116.66(14) . . yes 
C1 C6 C42 123.74(14) . . yes 
C12 C7 C8 117.8(2) . . yes 
C12 C7 C1 120.15(15) . . yes 
C8 C7 C1 121.4(2) . . yes 
C9 C8 C7 121.3(2) . . yes 
C9 C8 H8 120.7(10) . . ? 
C7 C8 H8 118.0(10) . . ? 
C8 C9 C10 120.2(2) . . yes 
C8 C9 H9 115.7(11) . . ? 
C10 C9 H9 124.0(11) . . ? 
C11 C10 C9 119.7(2) . . yes 
C11 C10 H10 120.3(12) . . ? 
C9 C10 H10 120.0(12) . . ? 
C10 C11 C12 121.4(2) . . yes 
C10 C11 H11 118.9(11) . . ? 
C12 C11 H11 119.7(11) . . ? 
C11 C12 C7 119.5(2) . . yes 
C11 C12 C13 121.8(2) . . yes 
C7 C12 C13 118.70(15) . . yes 
C14 C13 C18 118.7(2) . . yes 
C14 C13 C12 122.4(2) . . yes 
C18 C13 C12 118.91(15) . . yes 
C15 C14 C13 121.6(2) . . yes 
C15 C14 H14 123.1(12) . . ? 
C13 C14 H14 115.3(12) . . ? 
C14 C15 C16 119.9(2) . . yes 
C14 C15 H15 119.5(13) . . ? 
C16 C15 H15 120.6(13) . . ? 
C17 C16 C15 120.2(2) . . yes 
C17 C16 H16 118.9(11) . . ? 
C15 C16 H16 120.9(11) . . ? 
C16 C17 C18 121.3(2) . . yes 
C16 C17 H17 118.7(10) . . ? 
C18 C17 H17 119.9(10) . . ? 
C13 C18 C17 118.3(2) . . yes 
C13 C18 C2 119.99(15) . . yes 
C17 C18 C2 121.05(15) . . yes 
C20 C19 C24 118.2(2) . . yes 
C20 C19 C3 121.5(2) . . yes 
C24 C19 C3 119.8(2) . . yes 
C21 C20 C19 121.6(2) . . yes 
C21 C20 H20 119.3(10) . . ? 
C19 C20 H20 119.0(10) . . ? 
C20 C21 C22 120.2(2) . . yes 
C20 C21 H21 118.2(11) . . ? 
C22 C21 H21 121.6(11) . . ? 
C23 C22 C21 119.8(2) . . yes 
C23 C22 H22 120.0(13) . . ? 
C21 C22 H22 120.1(13) . . ? 
C22 C23 C24 121.4(2) . . yes 
C22 C23 H23 123.0(12) . . ? 
C24 C23 H23 115.6(12) . . ? 
C19 C24 C23 118.8(2) . . yes 
C19 C24 C25 118.5(2) . . yes 
C23 C24 C25 122.6(2) . . yes 
C30 C25 C26 118.7(2) . . yes 
C30 C25 C24 118.9(2) . . yes 
C26 C25 C24 122.3(2) . . yes 
C27 C26 C25 121.2(2) . . yes 
C27 C26 H26 118.4(12) . . ? 
C25 C26 H26 120.4(12) . . ? 
C26 C27 C28 120.0(2) . . yes 
C26 C27 H27 118.3(13) . . ? 
C28 C27 H27 121.7(14) . . ? 
C29 C28 C27 120.0(2) . . yes 
C29 C28 H28 119.2(12) . . ? 
C27 C28 H28 120.7(12) . . ? 
C28 C29 C30 121.2(2) . . yes 
C28 C29 H29 119.4(11) . . ? 
C30 C29 H29 119.3(11) . . ? 
C29 C30 C25 118.9(2) . . yes 
C29 C30 C4 120.7(2) . . yes 
C25 C30 C4 119.6(2) . . yes 
C32 C31 C36 118.5(2) . . yes 
C32 C31 C5 121.1(2) . . yes 
C36 C31 C5 119.7(2) . . yes 
C33 C32 C31 121.4(2) . . yes 
C33 C32 H32 120.1(11) . . ? 
C31 C32 H32 118.4(11) . . ? 
C32 C33 C34 119.6(2) . . yes 
C32 C33 H33 118.2(12) . . ? 
C34 C33 H33 122.2(12) . . ? 
C35 C34 C33 120.5(2) . . yes 
C35 C34 H34 119.4(13) . . ? 
C33 C34 H34 120.1(13) . . ? 
C34 C35 C36 121.1(2) . . yes 
C34 C35 H35 119.9(12) . . ? 
C36 C35 H35 118.9(12) . . ? 
C35 C36 C31 118.8(2) . . yes 
C35 C36 C37 122.8(2) . . yes 
C31 C36 C37 118.4(2) . . yes 
C42 C37 C38 118.8(2) . . yes 
C42 C37 C36 119.0(2) . . yes 
C38 C37 C36 122.3(2) . . yes 
C39 C38 C37 121.1(2) . . yes 
C39 C38 H38 122.5(13) . . ? 
C37 C38 H38 116.4(13) . . ? 
C38 C39 C40 120.3(2) . . yes 
C38 C39 H39 119.1(13) . . ? 
C40 C39 H39 120.5(13) . . ? 
C41 C40 C39 119.8(2) . . yes 
C41 C40 H40 120.6(13) . . ? 
C39 C40 H40 119.5(12) . . ? 
C40 C41 C42 121.5(2) . . yes 
C40 C41 H41 120.0(11) . . ? 
C42 C41 H41 118.4(11) . . ? 
C37 C42 C41 118.5(2) . . yes 
C37 C42 C6 119.9(2) . . yes 
C41 C42 C6 121.0(2) . . yes 
 
loop_ 
 _geom_torsion_atom_site_label_1 
 _geom_torsion_atom_site_label_2 
 _geom_torsion_atom_site_label_3 
 _geom_torsion_atom_site_label_4 
 _geom_torsion 
 _geom_torsion_site_symmetry_1 
 _geom_torsion_site_symmetry_2 
 _geom_torsion_site_symmetry_3 
 _geom_torsion_site_symmetry_4 
 _geom_torsion_publ_flag 
 C6 C1 C2 C3 14.8(2) . . . . ? 
 C7 C1 C2 C3 -156.14(14) . . . . ? 
 C6 C1 C2 C18 -156.26(14) . . . . ? 
 C7 C1 C2 C18 32.8(2) . . . . ? 
 C1 C2 C3 C4 -15.3(2) . . . . ? 
 C18 C2 C3 C4 155.22(15) . . . . ? 
 C1 C2 C3 C19 156.39(15) . . . . ? 
 C18 C2 C3 C19 -33.1(2) . . . . ? 
 C2 C3 C4 C5 16.4(2) . . . . ? 
 C19 C3 C4 C5 -155.86(15) . . . . ? 
 C2 C3 C4 C30 -154.05(15) . . . . ? 
 C19 C3 C4 C30 33.7(2) . . . . ? 
 C3 C4 C5 C6 -17.6(2) . . . . ? 
 C30 C4 C5 C6 152.3(2) . . . . ? 
 C3 C4 C5 C31 153.8(2) . . . . ? 
 C30 C4 C5 C31 -36.3(2) . . . . ? 
 C4 C5 C6 C1 17.0(2) . . . . ? 
 C31 C5 C6 C1 -154.74(15) . . . . ? 
 C4 C5 C6 C42 -154.57(15) . . . . ? 
 C31 C5 C6 C42 33.7(2) . . . . ? 
 C2 C1 C6 C5 -15.8(2) . . . . ? 
 C7 C1 C6 C5 154.56(15) . . . . ? 
 C2 C1 C6 C42 155.17(15) . . . . ? 
 C7 C1 C6 C42 -34.5(2) . . . . ? 
 C2 C1 C7 C12 -20.2(2) . . . . ? 
 C6 C1 C7 C12 169.19(15) . . . . ? 
 C2 C1 C7 C8 149.9(2) . . . . ? 
 C6 C1 C7 C8 -20.6(2) . . . . ? 
 C12 C7 C8 C9 -2.1(3) . . . . ? 
 C1 C7 C8 C9 -172.5(2) . . . . ? 
 C7 C8 C9 C10 -0.4(3) . . . . ? 
 C8 C9 C10 C11 2.0(3) . . . . ? 
 C9 C10 C11 C12 -1.1(3) . . . . ? 
 C10 C11 C12 C7 -1.4(3) . . . . ? 
 C10 C11 C12 C13 177.0(2) . . . . ? 
 C8 C7 C12 C11 2.9(2) . . . . ? 
 C1 C7 C12 C11 173.4(2) . . . . ? 
 C8 C7 C12 C13 -175.6(2) . . . . ? 
 C1 C7 C12 C13 -5.0(2) . . . . ? 
 C11 C12 C13 C14 20.3(3) . . . . ? 
 C7 C12 C13 C14 -161.3(2) . . . . ? 
 C11 C12 C13 C18 -161.5(2) . . . . ? 
 C7 C12 C13 C18 16.9(2) . . . . ? 
 C18 C13 C14 C15 -1.6(3) . . . . ? 
 C12 C13 C14 C15 176.6(2) . . . . ? 
 C13 C14 C15 C16 -0.9(3) . . . . ? 
 C14 C15 C16 C17 1.3(3) . . . . ? 
 C15 C16 C17 C18 0.9(3) . . . . ? 
 C14 C13 C18 C17 3.7(2) . . . . ? 
 C12 C13 C18 C17 -174.6(2) . . . . ? 
 C14 C13 C18 C2 174.4(2) . . . . ? 
 C12 C13 C18 C2 -3.9(2) . . . . ? 
 C16 C17 C18 C13 -3.4(3) . . . . ? 
 C16 C17 C18 C2 -174.0(2) . . . . ? 
 C1 C2 C18 C13 -21.4(2) . . . . ? 
 C3 C2 C18 C13 167.87(15) . . . . ? 
 C1 C2 C18 C17 149.0(2) . . . . ? 
 C3 C2 C18 C17 -21.7(2) . . . . ? 
 C4 C3 C19 C20 150.7(2) . . . . ? 
 C2 C3 C19 C20 -21.1(2) . . . . ? 
 C4 C3 C19 C24 -20.5(2) . . . . ? 
 C2 C3 C19 C24 167.6(2) . . . . ? 
 C24 C19 C20 C21 -2.0(3) . . . . ? 
 C3 C19 C20 C21 -173.3(2) . . . . ? 
 C19 C20 C21 C22 1.1(3) . . . . ? 
 C20 C21 C22 C23 0.4(3) . . . . ? 
 C21 C22 C23 C24 -0.9(3) . . . . ? 
 C20 C19 C24 C23 1.4(3) . . . . ? 
 C3 C19 C24 C23 172.9(2) . . . . ? 
 C20 C19 C24 C25 -177.8(2) . . . . ? 
 C3 C19 C24 C25 -6.3(2) . . . . ? 
 C22 C23 C24 C19 0.1(3) . . . . ? 
 C22 C23 C24 C25 179.2(2) . . . . ? 
 C19 C24 C25 C30 19.5(2) . . . . ? 
 C23 C24 C25 C30 -159.7(2) . . . . ? 
 C19 C24 C25 C26 -158.1(2) . . . . ? 
 C23 C24 C25 C26 22.7(3) . . . . ? 
 C30 C25 C26 C27 -0.7(3) . . . . ? 
 C24 C25 C26 C27 176.9(2) . . . . ? 
 C25 C26 C27 C28 -0.3(3) . . . . ? 
 C26 C27 C28 C29 0.1(4) . . . . ? 
 C27 C28 C29 C30 0.9(3) . . . . ? 
 C28 C29 C30 C25 -1.9(3) . . . . ? 
 C28 C29 C30 C4 -171.7(2) . . . . ? 
 C26 C25 C30 C29 1.7(3) . . . . ? 
 C24 C25 C30 C29 -175.9(2) . . . . ? 
 C26 C25 C30 C4 171.7(2) . . . . ? 
 C24 C25 C30 C4 -6.0(2) . . . . ? 
 C3 C4 C30 C29 148.7(2) . . . . ? 
 C5 C4 C30 C29 -21.4(3) . . . . ? 
 C3 C4 C30 C25 -21.1(2) . . . . ? 
 C5 C4 C30 C25 168.9(2) . . . . ? 
 C6 C5 C31 C32 148.6(2) . . . . ? 
 C4 C5 C31 C32 -23.0(2) . . . . ? 
 C6 C5 C31 C36 -21.7(2) . . . . ? 
 C4 C5 C31 C36 166.8(2) . . . . ? 
 C36 C31 C32 C33 -2.6(3) . . . . ? 
 C5 C31 C32 C33 -172.9(2) . . . . ? 
 C31 C32 C33 C34 0.0(3) . . . . ? 
 C32 C33 C34 C35 1.6(3) . . . . ? 
 C33 C34 C35 C36 -0.5(3) . . . . ? 
 C34 C35 C36 C31 -2.1(3) . . . . ? 
 C34 C35 C36 C37 176.6(2) . . . . ? 
 C32 C31 C36 C35 3.6(2) . . . . ? 
 C5 C31 C36 C35 174.1(2) . . . . ? 
 C32 C31 C36 C37 -175.1(2) . . . . ? 
 C5 C31 C36 C37 -4.6(2) . . . . ? 
 C35 C36 C37 C42 -160.7(2) . . . . ? 
 C31 C36 C37 C42 18.0(2) . . . . ? 
 C35 C36 C37 C38 19.9(3) . . . . ? 
 C31 C36 C37 C38 -161.5(2) . . . . ? 
 C42 C37 C38 C39 -0.8(3) . . . . ? 
 C36 C37 C38 C39 178.7(2) . . . . ? 
 C37 C38 C39 C40 -1.2(3) . . . . ? 
 C38 C39 C40 C41 1.4(3) . . . . ? 
 C39 C40 C41 C42 0.4(3) . . . . ? 
 C38 C37 C42 C41 2.5(2) . . . . ? 
 C36 C37 C42 C41 -177.0(2) . . . . ? 
 C38 C37 C42 C6 173.8(2) . . . . ? 
 C36 C37 C42 C6 -5.7(2) . . . . ? 
 C40 C41 C42 C37 -2.3(3) . . . . ? 
 C40 C41 C42 C6 -173.6(2) . . . . ? 
 C5 C6 C42 C37 -20.5(2) . . . . ? 
 C1 C6 C42 C37 168.3(2) . . . . ? 
 C5 C6 C42 C41 150.6(2) . . . . ? 
 C1 C6 C42 C41 -20.5(2) . . . . ? 
 


# Data for Compound 1 (hexabenzotriphenylene; low temperature determination)

data_rap008df 
 
_audit_creation_method            SHELXL 
_chemical_name_systematic 
; 
 Dibenzo[f,j]phenanthro[9,10-s]picene 
; 
_chemical_name_common             'Hexabenzotriphenylene' 
_chemical_formula_moiety          'C42 H24' 
_chemical_formula_structural      'C42 H24' 
_chemical_formula_analytical      ? 
_chemical_formula_sum             'C42 H24' 
_chemical_formula_weight          528.61 
_chemical_melting_point           'above 350 deg C' 
_chemical_compound_source         'chemical synthesis' 
 
loop_ 
 _atom_type_symbol 
 _atom_type_description 
 _atom_type_scat_dispersion_real 
 _atom_type_scat_dispersion_imag 
 _atom_type_scat_source 
 'C'  'C'   0.0033   0.0016 
 'International Tables Vol C Tables 4.2.6.8 and 6.1.1.4' 
 'H'  'H'   0.0000   0.0000 
 'International Tables Vol C Tables 4.2.6.8 and 6.1.1.4' 
 
_symmetry_cell_setting            Monoclinic 
_symmetry_space_group_name_H-M    P2(1)/c 
 
loop_ 
 _symmetry_equiv_pos_as_xyz 
 'x, y, z' 
 '-x, y+1/2, -z+1/2' 
 '-x, -y, -z' 
 'x, -y-1/2, z-1/2' 
 
_cell_length_a                    19.8971(8) 
_cell_length_b                    6.9274(2) 
_cell_length_c                    19.4153(8) 
_cell_angle_alpha                 90.00 
_cell_angle_beta                  103.846(1) 
_cell_angle_gamma                 90.00 
_cell_volume                      2598.3(2) 
_cell_formula_units_Z             4 
_cell_measurement_temperature     110(2) 
_cell_measurement_reflns_used     57890 
_cell_measurement_theta_min       1.05 
_cell_measurement_theta_max       27.50 
 
_exptl_crystal_description        'Plate' 
_exptl_crystal_colour             'Orange' 
_exptl_crystal_size_max           0.28 
_exptl_crystal_size_mid           0.25 
_exptl_crystal_size_min           0.04 
_exptl_crystal_density_meas       'none' 
_exptl_crystal_density_diffrn     1.351 
_exptl_crystal_density_method     ? 
_exptl_crystal_F_000              1104 
_exptl_absorpt_coefficient_mu     0.077 
_exptl_absorpt_correction_type    ? 
_exptl_absorpt_correction_T_min   ? 
_exptl_absorpt_correction_T_max   ? 
 
_exptl_special_details 
; 
 Sample mounted on glass fiber 
; 
 
_diffrn_ambient_temperature       110(2) 
_diffrn_radiation_wavelength      0.71073 
_diffrn_radiation_type            MoK\a 
_diffrn_radiation_source          'fine-focus sealed tube' 
_diffrn_radiation_monochromator   graphite 
_diffrn_measurement_device        'Nonius KappaCCD' 
_diffrn_measurement_method        'oscillations; 1300 deg data in 2 deg increments' 
_diffrn_standards_number          0 
_diffrn_standards_interval_count  ? 
_diffrn_standards_interval_time   ? 
_diffrn_standards_decay_%         ? 
_diffrn_reflns_number             57890 
_diffrn_reflns_av_R_equivalents   0.102 
_diffrn_reflns_av_sigmaI/netI     0.0584 
_diffrn_reflns_limit_h_min        -25 
_diffrn_reflns_limit_h_max        25 
_diffrn_reflns_limit_k_min        -9 
_diffrn_reflns_limit_k_max        0 
_diffrn_reflns_limit_l_min        0 
_diffrn_reflns_limit_l_max        25 
_diffrn_reflns_theta_min          1.05 
_diffrn_reflns_theta_max          27.50 
_reflns_number_total              5952 
_reflns_number_observed           3809 
_reflns_observed_criterion        >2sigma(I) 
 
_computing_data_collection        'Nonius COLLECT' 
_computing_cell_refinement        'DENZO-SMN' 
_computing_data_reduction         'DENZO-SMN' 
_computing_structure_solution     'Siemens SHELXTL' 
_computing_structure_refinement   'Siemens SHELXTL' 
_computing_molecular_graphics     'Siemens SHELXTL' 
_computing_publication_material   'Siemens SHELXTL' 
 
_refine_special_details 
; 
 Refinement on F^2^ for ALL reflections except for 0 with very negative F^2^ 
 or flagged by the user for potential systematic errors.  Weighted R-factors 
 wR and all goodnesses of fit S are based on F^2^, conventional R-factors R 
 are based on F, with F set to zero for negative F^2^. The observed criterion 
 of F^2^ > 2sigma(F^2^) is used only for calculating _R_factor_obs etc. and is 
 not relevant to the choice of reflections for refinement.  R-factors based 
 on F^2^ are statistically about twice as large as those based on F, and R- 
 factors based on ALL data will be even larger. 
; 
 
_refine_ls_structure_factor_coef  Fsqd  
_refine_ls_matrix_type            full 
_refine_ls_weighting_scheme 
 'calc w=1/[\s^2^(Fo^2^)+(0.0901P)^2^+0.1060P] where P=(Fo^2^+2Fc^2^)/3' 
_atom_sites_solution_primary      direct 
_atom_sites_solution_secondary    difmap 
_atom_sites_solution_hydrogens    difmap 
_refine_ls_hydrogen_treatment     'xyz refined, isotropic' 
_refine_ls_extinction_method      none 
_refine_ls_extinction_coef        ? 
_refine_ls_number_reflns          5952 
_refine_ls_number_parameters      475 
_refine_ls_number_restraints      0 
_refine_ls_R_factor_all           0.0962 
_refine_ls_R_factor_obs           0.0563 
_refine_ls_wR_factor_all          0.1621 
_refine_ls_wR_factor_obs          0.1417 
_refine_ls_goodness_of_fit_all    1.054 
_refine_ls_goodness_of_fit_obs    1.176 
_refine_ls_restrained_S_all       1.054 
_refine_ls_restrained_S_obs       1.176 
_refine_ls_shift/esd_max          0.000 
_refine_ls_shift/esd_mean         0.000 
_refine_diff_density_max          0.268 
_refine_diff_density_min         -0.284 
_refine_diff_density_rms          0.057 

 
loop_ 
 _atom_site_label 
 _atom_site_type_symbol 
 _atom_site_fract_x 
 _atom_site_fract_y 
 _atom_site_fract_z 
 _atom_site_U_iso_or_equiv 
 _atom_site_thermal_displace_type 
 _atom_site_occupancy 
 _atom_site_calc_flag 
 _atom_site_refinement_flags 
 _atom_site_disorder_group 
C1 C 0.16341(10) 0.8137(2) 0.13480(10) 0.0215(4) Uani 1 d . . 
C2 C 0.18715(10) 0.6881(2) 0.08893(10) 0.0217(4) Uani 1 d . . 
C3 C 0.25526(10) 0.6070(3) 0.11082(10) 0.0224(4) Uani 1 d . . 
C4 C 0.30233(10) 0.6872(3) 0.16821(10) 0.0230(4) Uani 1 d . . 
C5 C 0.27807(10) 0.8122(3) 0.21592(10) 0.0233(4) Uani 1 d . . 
C6 C 0.21223(10) 0.8944(3) 0.19448(10) 0.0230(4) Uani 1 d . . 
C7 C 0.08799(10) 0.8310(2) 0.12478(11) 0.0231(4) Uani 1 d . . 
C8 C 0.05847(11) 0.8726(3) 0.18213(11) 0.0258(4) Uani 1 d . . 
H8 H 0.0889(10) 0.8998(26) 0.2277(11) 0.021(5) Uiso 1 d . . 
C9 C -0.01232(11) 0.8673(3) 0.17468(12) 0.0294(5) Uani 1 d . . 
H9 H -0.0297(11) 0.8898(29) 0.2176(12) 0.033(6) Uiso 1 d . . 
C10 C -0.05635(11) 0.8221(3) 0.10960(12) 0.0313(5) Uani 1 d . . 
H10 H -0.1076(11) 0.8138(27) 0.1055(11) 0.031(6) Uiso 1 d . . 
C11 C -0.02859(11) 0.7767(3) 0.05347(12) 0.0294(5) Uani 1 d . . 
H11 H -0.0608(10) 0.7375(27) 0.0077(12) 0.026(5) Uiso 1 d . . 
C12 C 0.04341(10) 0.7776(3) 0.05984(11) 0.0249(4) Uani 1 d . . 
C13 C 0.07339(10) 0.7196(2) 0.00153(11) 0.0254(4) Uani 1 d . . 
C14 C 0.03434(11) 0.7187(3) -0.06894(12) 0.0313(5) Uani 1 d . . 
H14 H -0.0156(11) 0.7491(27) -0.0773(11) 0.025(5) Uiso 1 d . . 
C15 C 0.06402(12) 0.6718(3) -0.12384(12) 0.0324(5) Uani 1 d . . 
H15 H 0.0335(12) 0.6752(29) -0.1744(13) 0.040(6) Uiso 1 d . . 
C16 C 0.13418(11) 0.6310(3) -0.10957(12) 0.0290(5) Uani 1 d . . 
H16 H 0.1560(10) 0.6032(27) -0.1492(11) 0.024(5) Uiso 1 d . . 
C17 C 0.17345(11) 0.6313(3) -0.04098(11) 0.0253(4) Uani 1 d . . 
H17 H 0.2261(11) 0.6079(28) -0.0322(11) 0.031(6) Uiso 1 d . . 
C18 C 0.14376(10) 0.6705(2) 0.01645(10) 0.0230(4) Uani 1 d . . 
C19 C 0.27650(10) 0.4265(3) 0.08134(10) 0.0237(4) Uani 1 d . . 
C20 C 0.22718(11) 0.2907(3) 0.04771(11) 0.0263(5) Uani 1 d . . 
H20 H 0.1763(11) 0.3172(26) 0.0409(11) 0.024(5) Uiso 1 d . . 
C21 C 0.24677(12) 0.1134(3) 0.02666(12) 0.0318(5) Uani 1 d . . 
H21 H 0.2095(10) 0.0203(28) 0.0031(10) 0.026(5) Uiso 1 d . . 
C22 C 0.31682(12) 0.0656(3) 0.03938(12) 0.0350(5) Uani 1 d . . 
H22 H 0.3305(11) -0.0673(31) 0.0261(12) 0.034(6) Uiso 1 d . . 
C23 C 0.36558(12) 0.1949(3) 0.07338(11) 0.0323(5) Uani 1 d . . 
H23 H 0.4154(12) 0.1562(29) 0.0861(12) 0.036(6) Uiso 1 d . . 
C24 C 0.34679(11) 0.3781(3) 0.09483(11) 0.0270(5) Uani 1 d . . 
C25 C 0.39807(10) 0.5156(3) 0.13136(10) 0.0274(5) Uani 1 d . . 
C26 C 0.46744(11) 0.5108(3) 0.12715(12) 0.0326(5) Uani 1 d . . 
H26 H 0.4826(12) 0.3999(35) 0.0989(13) 0.048(7) Uiso 1 d . . 
C27 C 0.51399(11) 0.6491(3) 0.15924(12) 0.0353(5) Uani 1 d . . 
H27 H 0.5632(13) 0.6387(32) 0.1529(13) 0.052(7) Uiso 1 d . . 
C28 C 0.49242(11) 0.7979(3) 0.19750(12) 0.0327(5) Uani 1 d . . 
H28 H 0.5267(12) 0.9010(33) 0.2208(13) 0.045(7) Uiso 1 d . . 
C29 C 0.42475(10) 0.8058(3) 0.20257(11) 0.0280(5) Uani 1 d . . 
H29 H 0.4084(12) 0.9229(33) 0.2267(13) 0.044(6) Uiso 1 d . . 
C30 C 0.37628(10) 0.6644(3) 0.17106(10) 0.0249(4) Uani 1 d . . 
C31 C 0.31507(10) 0.8377(3) 0.29042(11) 0.0254(4) Uani 1 d . . 
C32 C 0.36140(10) 0.6962(3) 0.32612(11) 0.0274(5) Uani 1 d . . 
H32 H 0.3714(10) 0.5814(27) 0.2966(11) 0.023(5) Uiso 1 d . . 
C33 C 0.39116(11) 0.7094(3) 0.39724(12) 0.0316(5) Uani 1 d . . 
H33 H 0.4262(11) 0.6048(30) 0.4222(12) 0.034(6) Uiso 1 d . . 
C34 C 0.37552(11) 0.8658(3) 0.43612(12) 0.0323(5) Uani 1 d . . 
H34 H 0.3973(12) 0.8763(30) 0.4874(13) 0.040(6) Uiso 1 d . . 
C35 C 0.32897(11) 1.0031(3) 0.40323(11) 0.0300(5) Uani 1 d . . 
H35 H 0.3173(11) 1.1176(31) 0.4318(12) 0.035(6) Uiso 1 d . . 
C36 C 0.29705(10) 0.9911(3) 0.33047(11) 0.0257(4) Uani 1 d . . 
C37 C 0.24490(10) 1.1282(3) 0.29459(11) 0.0266(5) Uani 1 d . . 
C38 C 0.23733(12) 1.3105(3) 0.32373(12) 0.0323(5) Uani 1 d . . 
H38 H 0.2694(11) 1.3478(30) 0.3708(13) 0.037(6) Uiso 1 d . . 
C39 C 0.18838(12) 1.4400(3) 0.28887(13) 0.0352(5) Uani 1 d . . 
H39 H 0.1854(11) 1.5720(33) 0.3107(12) 0.042(6) Uiso 1 d . . 
C40 C 0.14648(12) 1.3912(3) 0.22296(13) 0.0326(5) Uani 1 d . . 
H40 H 0.1118(10) 1.4834(28) 0.1952(11) 0.027(5) Uiso 1 d . . 
C41 C 0.15300(11) 1.2131(3) 0.19345(12) 0.0267(5) Uani 1 d . . 
H41 H 0.1222(11) 1.1869(28) 0.1452(12) 0.032(6) Uiso 1 d . . 
C42 C 0.20106(10) 1.0765(3) 0.22900(11) 0.0244(4) Uani 1 d . . 
 
loop_ 
 _atom_site_aniso_label 
 _atom_site_aniso_U_11 
 _atom_site_aniso_U_22 
 _atom_site_aniso_U_33 
 _atom_site_aniso_U_23 
 _atom_site_aniso_U_13 
 _atom_site_aniso_U_12 
C1 0.0216(10) 0.0213(9) 0.0224(10) 0.0024(7) 0.0070(8) 0.0006(7) 
C2 0.0216(10) 0.0204(9) 0.0234(10) 0.0021(7) 0.0061(8) -0.0016(7) 
C3 0.0235(10) 0.0224(9) 0.0221(10) 0.0005(7) 0.0073(8) 0.0006(7) 
C4 0.0248(10) 0.0221(9) 0.0218(10) 0.0019(8) 0.0049(8) 0.0011(7) 
C5 0.0235(10) 0.0249(10) 0.0216(10) 0.0013(8) 0.0052(8) -0.0017(8) 
C6 0.0249(11) 0.0247(10) 0.0206(10) 0.0020(8) 0.0075(8) 0.0002(8) 
C7 0.0223(10) 0.0206(9) 0.0267(11) 0.0024(8) 0.0064(9) 0.0029(7) 
C8 0.0266(11) 0.0274(10) 0.0234(11) 0.0014(8) 0.0060(9) 0.0023(8) 
C9 0.0275(12) 0.0333(11) 0.0297(12) 0.0027(9) 0.0115(10) 0.0026(9) 
C10 0.0227(12) 0.0334(11) 0.0378(13) -0.0004(9) 0.0072(10) 0.0013(9) 
C11 0.0261(11) 0.0288(10) 0.0317(12) -0.0027(9) 0.0040(10) 0.0006(8) 
C12 0.0242(11) 0.0216(9) 0.0279(11) 0.0006(8) 0.0043(9) 0.0033(8) 
C13 0.0267(11) 0.0197(9) 0.0288(11) 0.0005(8) 0.0048(9) 0.0005(8) 
C14 0.0281(12) 0.0327(11) 0.0304(12) -0.0017(9) 0.0017(10) 0.0065(9) 
C15 0.0368(13) 0.0318(11) 0.0244(12) -0.0013(9) -0.0007(10) 0.0070(9) 
C16 0.0350(13) 0.0265(10) 0.0259(12) -0.0026(8) 0.0079(10) 0.0041(9) 
C17 0.0273(11) 0.0212(9) 0.0266(11) 0.0007(8) 0.0046(9) 0.0003(8) 
C18 0.0240(10) 0.0197(9) 0.0243(11) -0.0012(8) 0.0038(9) 0.0000(7) 
C19 0.0313(11) 0.0228(9) 0.0181(10) 0.0016(7) 0.0083(9) 0.0021(8) 
C20 0.0321(12) 0.0243(10) 0.0239(11) 0.0017(8) 0.0093(9) 0.0017(8) 
C21 0.0421(14) 0.0243(10) 0.0303(12) 0.0009(9) 0.0110(10) -0.0031(9) 
C22 0.051(2) 0.0252(11) 0.0316(13) -0.0001(9) 0.0157(11) 0.0081(10) 
C23 0.0374(13) 0.0326(11) 0.0277(12) 0.0048(9) 0.0093(10) 0.0113(10) 
C24 0.0298(11) 0.0298(10) 0.0217(11) 0.0034(8) 0.0068(9) 0.0065(8) 
C25 0.0269(11) 0.0346(11) 0.0205(10) 0.0039(8) 0.0052(9) 0.0067(8) 
C26 0.0281(12) 0.0438(12) 0.0262(12) 0.0016(10) 0.0072(10) 0.0066(10) 
C27 0.0242(12) 0.0557(14) 0.0271(12) 0.0044(10) 0.0085(10) 0.0037(10) 
C28 0.0258(11) 0.0459(13) 0.0264(12) -0.0005(10) 0.0065(9) -0.0049(10) 
C29 0.0252(11) 0.0364(12) 0.0224(11) 0.0006(9) 0.0056(9) -0.0007(9) 
C30 0.0248(11) 0.0302(10) 0.0199(10) 0.0047(8) 0.0058(8) 0.0031(8) 
C31 0.0220(10) 0.0305(10) 0.0240(11) -0.0014(8) 0.0063(9) -0.0045(8) 
C32 0.0224(11) 0.0338(11) 0.0267(11) -0.0021(9) 0.0071(9) -0.0034(8) 
C33 0.0248(11) 0.0421(12) 0.0280(12) 0.0035(9) 0.0065(9) -0.0044(9) 
C34 0.0269(12) 0.0468(13) 0.0227(12) -0.0034(10) 0.0048(9) -0.0083(10) 
C35 0.0284(12) 0.0361(12) 0.0275(12) -0.0068(9) 0.0106(10) -0.0084(9) 
C36 0.0260(11) 0.0287(10) 0.0248(11) -0.0036(8) 0.0112(9) -0.0085(8) 
C37 0.0265(11) 0.0267(10) 0.0307(12) -0.0023(8) 0.0147(9) -0.0060(8) 
C38 0.0372(13) 0.0309(11) 0.0323(13) -0.0073(9) 0.0154(11) -0.0079(9) 
C39 0.0435(14) 0.0255(11) 0.0437(14) -0.0050(10) 0.0246(12) -0.0038(10) 
C40 0.0395(13) 0.0225(10) 0.0423(14) 0.0056(9) 0.0228(11) 0.0013(9) 
C41 0.0267(11) 0.0259(10) 0.0303(12) 0.0023(8) 0.0122(9) 0.0004(8) 
C42 0.0250(11) 0.0248(10) 0.0265(11) -0.0009(8) 0.0126(9) -0.0039(8) 
 
_geom_special_details 
; 
 All esds (except the esd in the dihedral angle between two l.s. planes) 
 are estimated using the full covariance matrix.  The cell esds are taken 
 into account individually in the estimation of esds in distances, angles 
 and torsion angles; correlations between esds in cell parameters are only 
 used when they are defined by crystal symmetry.  An approximate (isotropic) 
 treatment of cell esds is used for estimating esds involving l.s. planes. 
; 
 
loop_ 
 _geom_bond_atom_site_label_1 
 _geom_bond_atom_site_label_2 
 _geom_bond_distance 
 _geom_bond_site_symmetry_2 
 _geom_bond_publ_flag 
C1 C2 1.406(3) . yes 
C1 C6 1.435(3) . yes 
C1 C7 1.471(3) . yes 
C2 C3 1.434(3) . yes 
C2 C18 1.469(3) . yes 
C3 C4 1.388(3) . yes 
C3 C19 1.479(3) . yes 
C4 C5 1.434(3) . yes 
C4 C30 1.468(3) . yes 
C5 C6 1.397(3) . yes 
C5 C31 1.468(3) . yes 
C6 C42 1.471(3) . yes 
C7 C12 1.406(3) . yes 
C7 C8 1.407(3) . yes 
C8 C9 1.382(3) . yes 
C8 H8 0.96(2) . ? 
C9 C10 1.390(3) . yes 
C9 H9 0.99(2) . ? 
C10 C11 1.371(3) . yes 
C10 H10 1.00(2) . ? 
C11 C12 1.408(3) . yes 
C11 H11 1.00(2) . ? 
C12 C13 1.457(3) . yes 
C13 C18 1.402(3) . yes 
C13 C14 1.402(3) . yes 
C14 C15 1.375(3) . yes 
C14 H14 0.99(2) . ? 
C15 C16 1.386(3) . yes 
C15 H15 1.02(2) . ? 
C16 C17 1.373(3) . yes 
C16 H16 0.99(2) . ? 
C17 C18 1.407(3) . yes 
C17 H17 1.03(2) . ? 
C19 C24 1.400(3) . yes 
C19 C20 1.403(3) . yes 
C20 C21 1.380(3) . yes 
C20 H20 1.01(2) . ? 
C21 C22 1.396(3) . yes 
C21 H21 1.01(2) . ? 
C22 C23 1.368(3) . yes 
C22 H22 1.01(2) . ? 
C23 C24 1.414(3) . yes 
C23 H23 1.00(2) . ? 
C24 C25 1.451(3) . yes 
C25 C26 1.402(3) . yes 
C25 C30 1.416(3) . yes 
C26 C27 1.374(3) . yes 
C26 H26 1.03(2) . ? 
C27 C28 1.397(3) . yes 
C27 H27 1.02(3) . ? 
C28 C29 1.374(3) . yes 
C28 H28 1.02(2) . ? 
C29 C30 1.407(3) . yes 
C29 H29 1.03(2) . ? 
C31 C32 1.409(3) . yes 
C31 C36 1.412(3) . yes 
C32 C33 1.369(3) . yes 
C32 H32 1.03(2) . ? 
C33 C34 1.398(3) . yes 
C33 H33 1.04(2) . ? 
C34 C35 1.374(3) . yes 
C34 H34 0.99(2) . ? 
C35 C36 1.406(3) . yes 
C35 H35 1.03(2) . ? 
C36 C37 1.455(3) . yes 
C37 C38 1.407(3) . yes 
C37 C42 1.407(3) . yes 
C38 C39 1.377(3) . yes 
C38 H38 1.02(2) . ? 
C39 C40 1.391(3) . yes 
C39 H39 1.02(2) . ? 
C40 C41 1.380(3) . yes 
C40 H40 1.00(2) . ? 
C41 C42 1.403(3) . yes 
C41 H41 1.01(2) . ? 
 
loop_ 
 _geom_angle_atom_site_label_1 
 _geom_angle_atom_site_label_2 
 _geom_angle_atom_site_label_3 
 _geom_angle 
 _geom_angle_site_symmetry_1 
 _geom_angle_site_symmetry_3 
 _geom_angle_publ_flag 
C2 C1 C6 119.2(2) . . yes 
C2 C1 C7 116.9(2) . . yes 
C6 C1 C7 123.2(2) . . yes 
C1 C2 C3 119.5(2) . . yes 
C1 C2 C18 116.7(2) . . yes 
C3 C2 C18 123.3(2) . . yes 
C4 C3 C2 119.3(2) . . yes 
C4 C3 C19 116.7(2) . . yes 
C2 C3 C19 123.6(2) . . yes 
C3 C4 C5 119.6(2) . . yes 
C3 C4 C30 117.7(2) . . yes 
C5 C4 C30 122.0(2) . . yes 
C6 C5 C4 119.4(2) . . yes 
C6 C5 C31 117.2(2) . . yes 
C4 C5 C31 122.8(2) . . yes 
C5 C6 C1 119.2(2) . . yes 
C5 C6 C42 116.5(2) . . yes 
C1 C6 C42 123.7(2) . . yes 
C12 C7 C8 118.0(2) . . yes 
C12 C7 C1 120.1(2) . . yes 
C8 C7 C1 121.2(2) . . yes 
C9 C8 C7 121.3(2) . . yes 
C9 C8 H8 120.2(12) . . ? 
C7 C8 H8 118.5(12) . . ? 
C8 C9 C10 120.4(2) . . yes 
C8 C9 H9 117.5(12) . . ? 
C10 C9 H9 122.0(12) . . ? 
C11 C10 C9 119.2(2) . . yes 
C11 C10 H10 121.2(12) . . ? 
C9 C10 H10 119.4(13) . . ? 
C10 C11 C12 121.6(2) . . yes 
C10 C11 H11 118.2(12) . . ? 
C12 C11 H11 120.1(12) . . ? 
C7 C12 C11 119.3(2) . . yes 
C7 C12 C13 118.8(2) . . yes 
C11 C12 C13 121.9(2) . . yes 
C18 C13 C14 119.6(2) . . yes 
C18 C13 C12 118.7(2) . . yes 
C14 C13 C12 121.7(2) . . yes 
C15 C14 C13 121.1(2) . . yes 
C15 C14 H14 121.6(12) . . ? 
C13 C14 H14 117.3(12) . . ? 
C14 C15 C16 119.5(2) . . yes 
C14 C15 H15 118.2(13) . . ? 
C16 C15 H15 122.3(13) . . ? 
C17 C16 C15 120.4(2) . . yes 
C17 C16 H16 120.1(12) . . ? 
C15 C16 H16 119.6(12) . . ? 
C16 C17 C18 121.3(2) . . yes 
C16 C17 H17 118.6(12) . . ? 
C18 C17 H17 120.0(12) . . ? 
C13 C18 C17 118.1(2) . . yes 
C13 C18 C2 120.4(2) . . yes 
C17 C18 C2 120.9(2) . . yes 
C24 C19 C20 118.9(2) . . yes 
C24 C19 C3 119.7(2) . . yes 
C20 C19 C3 121.0(2) . . yes 
C21 C20 C19 121.3(2) . . yes 
C21 C20 H20 118.0(11) . . ? 
C19 C20 H20 120.6(11) . . ? 
C20 C21 C22 120.0(2) . . yes 
C20 C21 H21 118.4(11) . . ? 
C22 C21 H21 121.6(11) . . ? 
C23 C22 C21 119.5(2) . . yes 
C23 C22 H22 121.1(12) . . ? 
C21 C22 H22 119.3(12) . . ? 
C22 C23 C24 121.5(2) . . yes 
C22 C23 H23 119.4(12) . . ? 
C24 C23 H23 119.0(12) . . ? 
C19 C24 C23 118.8(2) . . yes 
C19 C24 C25 119.2(2) . . yes 
C23 C24 C25 121.9(2) . . yes 
C26 C25 C30 118.8(2) . . yes 
C26 C25 C24 122.9(2) . . yes 
C30 C25 C24 118.2(2) . . yes 
C27 C26 C25 121.6(2) . . yes 
C27 C26 H26 120.6(13) . . ? 
C25 C26 H26 117.8(13) . . ? 
C26 C27 C28 119.7(2) . . yes 
C26 C27 H27 117.4(13) . . ? 
C28 C27 H27 122.9(13) . . ? 
C29 C28 C27 119.9(2) . . yes 
C29 C28 H28 120.4(13) . . ? 
C27 C28 H28 119.7(13) . . ? 
C28 C29 C30 121.5(2) . . yes 
C28 C29 H29 119.1(13) . . ? 
C30 C29 H29 119.3(13) . . ? 
C29 C30 C25 118.4(2) . . yes 
C29 C30 C4 121.2(2) . . yes 
C25 C30 C4 119.5(2) . . yes 
C32 C31 C36 118.4(2) . . yes 
C32 C31 C5 121.0(2) . . yes 
C36 C31 C5 120.0(2) . . yes 
C33 C32 C31 121.6(2) . . yes 
C33 C32 H32 121.3(11) . . ? 
C31 C32 H32 117.1(11) . . ? 
C32 C33 C34 119.9(2) . . yes 
C32 C33 H33 120.1(12) . . ? 
C34 C33 H33 120.0(12) . . ? 
C35 C34 C33 119.9(2) . . yes 
C35 C34 H34 120.1(13) . . ? 
C33 C34 H34 120.0(13) . . ? 
C34 C35 C36 121.2(2) . . yes 
C34 C35 H35 119.9(12) . . ? 
C36 C35 H35 118.9(12) . . ? 
C35 C36 C31 119.0(2) . . yes 
C35 C36 C37 122.8(2) . . yes 
C31 C36 C37 118.2(2) . . yes 
C38 C37 C42 119.3(2) . . yes 
C38 C37 C36 121.7(2) . . yes 
C42 C37 C36 118.9(2) . . yes 
C39 C38 C37 121.2(2) . . yes 
C39 C38 H38 119.7(12) . . ? 
C37 C38 H38 119.1(12) . . ? 
C38 C39 C40 119.5(2) . . yes 
C38 C39 H39 119.2(13) . . ? 
C40 C39 H39 121.3(13) . . ? 
C41 C40 C39 120.3(2) . . yes 
C41 C40 H40 118.0(12) . . ? 
C39 C40 H40 121.7(11) . . ? 
C40 C41 C42 121.3(2) . . yes 
C40 C41 H41 116.8(11) . . ? 
C42 C41 H41 121.9(11) . . ? 
C41 C42 C37 118.4(2) . . yes 
C41 C42 C6 120.9(2) . . yes 
C37 C42 C6 120.1(2) . . yes 
 
loop_ 
 _geom_torsion_atom_site_label_1 
 _geom_torsion_atom_site_label_2 
 _geom_torsion_atom_site_label_3 
 _geom_torsion_atom_site_label_4 
 _geom_torsion 
 _geom_torsion_site_symmetry_1 
 _geom_torsion_site_symmetry_2 
 _geom_torsion_site_symmetry_3 
 _geom_torsion_site_symmetry_4 
 _geom_torsion_publ_flag 
 C6 C1 C2 C3 14.6(3) . . . . ? 
 C7 C1 C2 C3 -156.1(2) . . . . ? 
 C6 C1 C2 C18 -156.6(2) . . . . ? 
 C7 C1 C2 C18 32.7(2) . . . . ? 
 C1 C2 C3 C4 -15.3(3) . . . . ? 
 C18 C2 C3 C4 155.3(2) . . . . ? 
 C1 C2 C3 C19 157.0(2) . . . . ? 
 C18 C2 C3 C19 -32.4(3) . . . . ? 
 C2 C3 C4 C5 16.6(3) . . . . ? 
 C19 C3 C4 C5 -156.2(2) . . . . ? 
 C2 C3 C4 C30 -153.9(2) . . . . ? 
 C19 C3 C4 C30 33.2(2) . . . . ? 
 C3 C4 C5 C6 -17.7(3) . . . . ? 
 C30 C4 C5 C6 152.5(2) . . . . ? 
 C3 C4 C5 C31 153.5(2) . . . . ? 
 C30 C4 C5 C31 -36.4(3) . . . . ? 
 C4 C5 C6 C1 16.9(3) . . . . ? 
 C31 C5 C6 C1 -154.7(2) . . . . ? 
 C4 C5 C6 C42 -154.7(2) . . . . ? 
 C31 C5 C6 C42 33.7(2) . . . . ? 
 C2 C1 C6 C5 -15.6(3) . . . . ? 
 C7 C1 C6 C5 154.5(2) . . . . ? 
 C2 C1 C6 C42 155.4(2) . . . . ? 
 C7 C1 C6 C42 -34.5(3) . . . . ? 
 C2 C1 C7 C12 -20.4(2) . . . . ? 
 C6 C1 C7 C12 169.3(2) . . . . ? 
 C2 C1 C7 C8 150.0(2) . . . . ? 
 C6 C1 C7 C8 -20.3(3) . . . . ? 
 C12 C7 C8 C9 -1.9(3) . . . . ? 
 C1 C7 C8 C9 -172.5(2) . . . . ? 
 C7 C8 C9 C10 -0.6(3) . . . . ? 
 C8 C9 C10 C11 2.1(3) . . . . ? 
 C9 C10 C11 C12 -0.9(3) . . . . ? 
 C8 C7 C12 C11 3.0(3) . . . . ? 
 C1 C7 C12 C11 173.7(2) . . . . ? 
 C8 C7 C12 C13 -175.3(2) . . . . ? 
 C1 C7 C12 C13 -4.6(3) . . . . ? 
 C10 C11 C12 C7 -1.6(3) . . . . ? 
 C10 C11 C12 C13 176.6(2) . . . . ? 
 C7 C12 C13 C18 16.4(3) . . . . ? 
 C11 C12 C13 C18 -161.9(2) . . . . ? 
 C7 C12 C13 C14 -161.2(2) . . . . ? 
 C11 C12 C13 C14 20.5(3) . . . . ? 
 C18 C13 C14 C15 -0.5(3) . . . . ? 
 C12 C13 C14 C15 177.1(2) . . . . ? 
 C13 C14 C15 C16 -2.1(3) . . . . ? 
 C14 C15 C16 C17 2.0(3) . . . . ? 
 C15 C16 C17 C18 0.8(3) . . . . ? 
 C14 C13 C18 C17 3.2(3) . . . . ? 
 C12 C13 C18 C17 -174.5(2) . . . . ? 
 C14 C13 C18 C2 174.2(2) . . . . ? 
 C12 C13 C18 C2 -3.5(3) . . . . ? 
 C16 C17 C18 C13 -3.4(3) . . . . ? 
 C16 C17 C18 C2 -174.3(2) . . . . ? 
 C1 C2 C18 C13 -21.5(2) . . . . ? 
 C3 C2 C18 C13 167.7(2) . . . . ? 
 C1 C2 C18 C17 149.3(2) . . . . ? 
 C3 C2 C18 C17 -21.5(3) . . . . ? 
 C4 C3 C19 C24 -20.3(3) . . . . ? 
 C2 C3 C19 C24 167.2(2) . . . . ? 
 C4 C3 C19 C20 151.5(2) . . . . ? 
 C2 C3 C19 C20 -21.0(3) . . . . ? 
 C24 C19 C20 C21 -1.3(3) . . . . ? 
 C3 C19 C20 C21 -173.2(2) . . . . ? 
 C19 C20 C21 C22 0.6(3) . . . . ? 
 C20 C21 C22 C23 0.7(3) . . . . ? 
 C21 C22 C23 C24 -1.3(3) . . . . ? 
 C20 C19 C24 C23 0.7(3) . . . . ? 
 C3 C19 C24 C23 172.7(2) . . . . ? 
 C20 C19 C24 C25 -178.3(2) . . . . ? 
 C3 C19 C24 C25 -6.3(3) . . . . ? 
 C22 C23 C24 C19 0.6(3) . . . . ? 
 C22 C23 C24 C25 179.5(2) . . . . ? 
 C19 C24 C25 C26 -158.6(2) . . . . ? 
 C23 C24 C25 C26 22.5(3) . . . . ? 
 C19 C24 C25 C30 19.3(3) . . . . ? 
 C23 C24 C25 C30 -159.6(2) . . . . ? 
 C30 C25 C26 C27 -1.4(3) . . . . ? 
 C24 C25 C26 C27 176.5(2) . . . . ? 
 C25 C26 C27 C28 0.4(3) . . . . ? 
 C26 C27 C28 C29 -0.3(3) . . . . ? 
 C27 C28 C29 C30 1.2(3) . . . . ? 
 C28 C29 C30 C25 -2.2(3) . . . . ? 
 C28 C29 C30 C4 -171.5(2) . . . . ? 
 C26 C25 C30 C29 2.3(3) . . . . ? 
 C24 C25 C30 C29 -175.7(2) . . . . ? 
 C26 C25 C30 C4 171.8(2) . . . . ? 
 C24 C25 C30 C4 -6.2(3) . . . . ? 
 C3 C4 C30 C29 148.7(2) . . . . ? 
 C5 C4 C30 C29 -21.6(3) . . . . ? 
 C3 C4 C30 C25 -20.5(3) . . . . ? 
 C5 C4 C30 C25 169.2(2) . . . . ? 
 C6 C5 C31 C32 148.6(2) . . . . ? 
 C4 C5 C31 C32 -22.7(3) . . . . ? 
 C6 C5 C31 C36 -22.0(3) . . . . ? 
 C4 C5 C31 C36 166.7(2) . . . . ? 
 C36 C31 C32 C33 -3.0(3) . . . . ? 
 C5 C31 C32 C33 -173.7(2) . . . . ? 
 C31 C32 C33 C34 0.2(3) . . . . ? 
 C32 C33 C34 C35 1.7(3) . . . . ? 
 C33 C34 C35 C36 -0.8(3) . . . . ? 
 C34 C35 C36 C31 -1.9(3) . . . . ? 
 C34 C35 C36 C37 176.8(2) . . . . ? 
 C32 C31 C36 C35 3.7(3) . . . . ? 
 C5 C31 C36 C35 174.6(2) . . . . ? 
 C32 C31 C36 C37 -175.0(2) . . . . ? 
 C5 C31 C36 C37 -4.2(3) . . . . ? 
 C35 C36 C37 C38 19.0(3) . . . . ? 
 C31 C36 C37 C38 -162.3(2) . . . . ? 
 C35 C36 C37 C42 -161.0(2) . . . . ? 
 C31 C36 C37 C42 17.7(3) . . . . ? 
 C42 C37 C38 C39 -0.8(3) . . . . ? 
 C36 C37 C38 C39 179.2(2) . . . . ? 
 C37 C38 C39 C40 -1.2(3) . . . . ? 
 C38 C39 C40 C41 1.3(3) . . . . ? 
 C39 C40 C41 C42 0.7(3) . . . . ? 
 C40 C41 C42 C37 -2.6(3) . . . . ? 
 C40 C41 C42 C6 -174.3(2) . . . . ? 
 C38 C37 C42 C41 2.7(3) . . . . ? 
 C36 C37 C42 C41 -177.3(2) . . . . ? 
 C38 C37 C42 C6 174.4(2) . . . . ? 
 C36 C37 C42 C6 -5.6(3) . . . . ? 
 C5 C6 C42 C41 151.0(2) . . . . ? 
 C1 C6 C42 C41 -20.2(3) . . . . ? 
 C5 C6 C42 C37 -20.5(3) . . . . ? 
 C1 C6 C42 C37 168.3(2) . . . . ? 
